# Supplementary material for: AI-Driven Case-Based Learning for English-Medium Medical Students: Applications in Teaching Benign Prostatic Hyperplasia
Source: Research Square preprint supplement (doi:10.21203/rs.3.rs-7944588/v1), 2026-01-22
Supplement: Supplementary file 1 [file a2334a8886ba5ff677eee665.pdf]

## English Interview Guide: AI-assisted CBL for EMI Students

Purpose of the interview:

To explore facilitators' experiences and perceptions regarding the integration of AI tools in case-based learning (CBL) sessions for English-medium instruction (EMI) students.

1. Can you briefly describe your teaching experience and role in the CBL sessions?
2. Have you used AI tools in your teaching before this study? If yes, please describe.
3. How satisfied were you with the AI-assisted CBL sessions for EMI students?
4. What aspects of the AI-assisted CBL sessions did you find most valuable?
5. How did AI tools affect student engagement and motivation, especially in English-language discussions?
6. Did AI-generated prompts influence students' clinical reasoning or problem-solving skills? Can you give examples?
7. How did AI tools impact your preparation workload for CBL sessions?
8. In your opinion, how did AI provide feedback to students, both in language and conceptual understanding?
9. Did you notice any inaccuracies or limitations in AI outputs during clinical case discussions? Please explain.
10. Did students show any tendency to over-rely on AI-generated content? How did you address this?

11. What support or training do facilitators need to use AI effectively in CBL sessions?
12. What improvements would you suggest for AI integration in future CBL sessions?
13. Are there specific types of clinical cases or learning activities where AI would be most or least helpful?
14. How do you envision the role of AI in medical education evolving in the next few years?
